# Supplementary material for: Work-related musculoskeletal disorder and health risk behaviors in market-vendors: a mixed-methods study
Source: PeerJ journal article supplement (doi:10.7717/peerj.18079), 2024-09-30
Supplement: Raw_data.xlsx [file Raw_data.xlsx]

## Sheet: Raw data
code	age	gender	weight	height	BMI	type_of_shop	Job descriptions					working_duration_year	workingday_per_week	workinghour_per_day	sitting_time	standing_time	walking_time	pain_in_past_7_day	Pain level in each area																											muscle flexibility
							selling	arranging_shop	lifting_load	serving_food	cooking								a1	a2	a3	a4	a5	a6	a7	a8	a9	a10	a11	a12	a13	a14	a15	a16	a17	a18	a19	a20	a21	a22	a23	a24	a25	a26	a27	rt_arm_flex	lt_arm_flex	rt_leg_flex	lt_leg_flex
c001	30	male	76	163	28.6	fruit and vegetable	Yes	Yes	Yes	No	No	10	7	12	6	6	-	0	-	-	-	-	-	-	-	-	-	-	-	-	-	-	-	-	-	-	-	-	-	-	-	-	-	-	-	0	-0.33	0.5	0.33
c002	65	female	50	152	21.64	seafood	Yes	Yes	No	No	No	15	7	12	12	0	-	1	-	-	-	-	-	-	-	-	-	-	-	-	-	-	-	-	-	-	-	-	-	5	-	-	-	-	-	-29.33	-26.67	0	0
c003	52	female	54	155	22.48	fruit and vegetable	Yes	Yes	No	No	No	20	7	12	2	10	-	1	-	-	-	-	-	-	-	-	-	-	-	-	-	-	-	-	-	-	-	-	-	9	-	-	-	-	-	-0.8	-0.67	0	0
c004	36	male	55	167	19.72	fruit and vegetable	Yes	Yes	No	No	No	2	7	12	5	7	-	0	-	-	-	-	-	-	-	-	-	-	-	-	-	-	-	-	-	-	-	-	-	-	-	-	-	-	-	-1.33	-3	-8.67	-11.33
c005	37	female	68	152	29.43	fruit and vegetable	Yes	No	No	No	No	10	7	12	8	2	2	0	-	-	-	-	-	-	-	-	-	-	-	-	-	-	-	-	-	-	-	-	-	-	-	-	-	-	-	0	-5.33	-17.67	-19.33
c006	59	male	60	160	23.44	fruit and vegetable	Yes	Yes	No	No	No	10	7	13	5	0	8	1	-	-	-	-	-	-	-	-	-	-	-	-	-	-	-	-	-	-	-	-	8	8	-	-	-	-	-	0	-3.33	0	0
c007	31	female	50	154	21.08	fruit and vegetable	Yes	Yes	No	No	No	15	7	11	8	0	3	0	-	-	-	-	-	-	-	-	-	-	-	-	-	-	-	-	-	-	-	-	-	-	-	-	-	-	-	0	-4	2.67	2.17
c008	28	male	63	175	20.57	fruit and vegetable	Yes	Yes	Yes	No	No	0.6	7	11	0	2	9	0	-	-	-	-	-	-	-	-	-	-	-	-	-	-	-	-	-	-	-	-	-	-	-	-	-	-	-	0	0	2	2
c009	27	female	61	158	24.44	fruit and vegetable	Yes	Yes	No	No	No	7	7	10	8	0	2	1	-	-	-	-	-	-	-	-	5	-	-	-	-	-	-	-	-	-	-	-	-	-	-	-	-	-	-	0	-15	2	1
c010	44	female	54	168	19.13	cooked food	Yes	Yes	No	No	Yes	10	7	12	5	7	-	1	-	-	-	-	-	-	-	-	-	-	-	-	-	-	-	-	-	-	-	-	5	-	5	-	5	-	-	2.97	-10.67	0	0
c011	35	female	46	150	20.44	cooked food	Yes	Yes	Yes	No	Yes	15	7	10	4	6	-	1	-	-	-	4	-	-	-	-	-	-	-	-	-	-	-	6	-	6	-	-	-	-	-	-	-	-	-	2.67	-8.17	3.3	2.17
c012	43	male	42	159	16.61	cooked food	Yes	No	No	No	No	20	7	7	7	0	-	1	-	-	-	-	-	-	-	-	6	6	-	-	-	-	-	-	-	-	-	-	-	-	-	-	-	-	-	0	0	0	0
c013	38	male	68	160	26.56	cooked food	Yes	Yes	No	No	Yes	15	7	13	4	9	-	1	-	5	-	-	-	-	-	-	-	-	-	-	-	-	-	-	-	-	-	-	-	-	-	-	-	-	-	-1	-1	8	6
c014	46	male	59	170	20.42	cooked food	Yes	Yes	No	No	Yes	0.167	6	13	2	11	-	1	-	-	-	-	-	-	-	-	5	-	-	-	-	-	-	-	-	-	-	-	-	-	-	-	-	-	-	0	0	2	1.33
c015	28	female	60	158	24.03	cooked food	Yes	Yes	No	No	No	3.83	7	11	0	9	2	1	-	-	-	-	-	-	-	-	7	-	-	-	-	-	-	-	-	-	-	-	-	-	-	-	6	6	-	0	0	0	0
c016	65	female	70	155	29.14	cooked food	Yes	Yes	No	No	Yes	1	7	14	4	10	-	1	-	-	2	2	-	-	-	-	-	6	-	-	-	-	-	-	-	-	-	-	-	-	-	-	-	6	-	-1.5	-1.3	3	2.5
c017	29	female	54	156	22.19	fruit and vegetable	Yes	Yes	No	No	No	0.75	7	11	0	11	-	1	-	-	-	-	-	-	-	-	7	-	-	-	-	-	-	-	-	-	-	-	-	-	-	-	-	5	-	0	0	2.17	1.83
c018	32	male	69	166	25.04	fruit and vegetable	Yes	Yes	Yes	No	No	2	7	10	0	2	8	1	-	-	7	7	-	-	-	-	-	-	-	-	-	-	6	6	-	-	-	-	5	5	-	-	-	-	-	0	-4.33	2.73	1.33
c019	35	male	68	171	23.26	fruit and vegetable	Yes	Yes	Yes	No	No	1.5	6	9	9	0	-	0	-	-	-	-	-	-	-	-	-	-	-	-	-	-	-	-	-	-	-	-	-	-	-	-	-	-	-	0	-4.03	0	0
c020	31	male	60	170	20.76	cooked food	No	Yes	Yes	No	No	10	7	13	3	0	10	1	-	-	-	-	-	-	-	-	-	-	-	-	-	-	-	-	-	-	-	-	-	-	-	3	-	-	-	-8	-7.33	0	0
c021	45	female	44	150	19.56	dried food	Yes	Yes	Yes	No	No	20	7	12	2	2	8	1	-	-	-	-	-	-	-	-	-	-	-	-	-	-	-	-	-	-	-	-	-	-	7	7	-	-	-	0.33	1.33	0	0
c022	30	female	54	160	21.09	cooked food	Yes	Yes	No	No	Yes	0.417	7	11	4	7	-	1	-	-	-	-	-	-	-	-	6	-	-	-	-	-	-	-	-	-	-	-	5	5	-	-	-	-	-	-2.27	-2.5	0	0
c023	35	male	68	175	22.2	cooked food	Yes	Yes	No	No	No	19	7	11	3	5	3	1	6	6	-	-	-	-	-	-	-	-	-	-	-	-	-	-	-	-	-	-	-	-	-	-	-	-	-	0	0	0	0
c024	56	female	61	156.5	24.91	cooked food	Yes	Yes	No	No	Yes	0.67	7	12	10	2	-	1	-	-	-	-	-	-	-	-	6	-	-	-	-	-	6	6	-	-	-	-	-	-	-	-	5	5	-	-6	-5	-9	-8
c025	31	female	56	156	23.01	cooked food	Yes	Yes	No	No	No	0.25	7	12	10	2	-	0	-	-	-	-	-	-	-	-	-	-	-	-	-	-	-	-	-	-	-	-	-	-	-	-	-	-	-	-3.23	-2.93	0	0
c026	32	male	64	169	22.41	cooked food	Yes	Yes	No	No	Yes	2.83	6	9	1	8	-	0	-	-	-	-	-	-	-	-	-	-	-	-	-	-	-	-	-	-	-	-	-	-	-	-	-	-	-	0	0	2.57	2.4
c027	41	male	87	185	25.42	cooked food	Yes	Yes	No	No	No	0.5	7	12	0	7	5	0	-	-	-	-	-	-	-	-	-	-	-	-	-	-	-	-	-	-	-	-	-	-	-	-	-	-	-	0	-8.67	0	0
c028	27	female	59	165.5	21.54	cooked food	Yes	Yes	No	No	No	1.33	7	12	0	3	9	0	-	-	-	-	-	-	-	-	-	-	-	-	-	-	-	-	-	-	-	-	-	-	-	-	-	-	-	0	0	0	0
c029	55	female	60	163	22.58	dried food	Yes	Yes	Yes	No	No	10	7	8	5	3	-	1	5	5	5	5	-	-	-	-	-	-	-	-	-	-	-	-	-	-	-	-	-	-	-	-	-	-	3	0	3.67	0	0
c030	65	female	60	156	24.65	seafood	Yes	No	No	No	No	10	2	12	10	0	2	0	-	-	-	-	-	-	-	-	-	-	-	-	-	-	-	-	-	-	-	-	-	-	-	-	-	-	-	-4	-6	-9.67	-9.67
c031	59	female	51	159	20.17	dried food	Yes	Yes	No	No	No	0.33	7	10	8	1	1	0	-	-	-	-	-	-	-	-	-	-	-	-	-	-	-	-	-	-	-	-	-	-	-	-	-	-	-	-6	-6.67	-13.33	-12.67
c032	36	female	92	165	33.79	fruit and vegetable	Yes	Yes	No	No	No	5	7	12	8	2	2	0	-	-	-	-	-	-	-	-	-	-	-	-	-	-	-	-	-	-	-	-	-	-	-	-	-	-	-	-4.33	-5.67	-10.67	-9.33
c033	41	female	58	157	23.53	dried food	Yes	Yes	No	No	No	4.67	7	10	9	0	1	0	-	-	-	-	-	-	-	-	-	-	-	-	-	-	-	-	-	-	-	-	-	-	-	-	-	-	-	1	-5.33	2	1.77
c034	45	male	74	167	26.53	consumer goods	No	Yes	Yes	No	No	10	7	10	5	2	3	0	-	-	-	-	-	-	-	-	-	-	-	-	-	-	-	-	-	-	-	-	-	-	-	-	-	-	-	-5.33	-3.67	-5	-5.67
c035	64	female	65	170	22.49	consumer goods	Yes	Yes	No	No	No	30	7	11	6	0	5	1	-	-	-	-	-	-	-	-	-	-	-	-	-	-	-	-	-	-	-	-	-	-	7	7	-	-	-	-16.33	-16.33	-9.67	-10.67
c036	30	female	52	160	20.31	dried food	Yes	No	No	No	No	5	7	8	8	0	-	0	-	-	-	-	-	-	-	-	-	-	-	-	-	-	-	-	-	-	-	-	-	-	-	-	-	-	-	17.33	12.4	-3	-5
c037	47	female	57	159	22.55	dried food	Yes	Yes	No	No	No	10	7	8	8	0	-	0	-	-	-	-	-	-	-	-	-	-	-	-	-	-	-	-	-	-	-	-	-	-	-	-	-	-	-	-1.67	-1	0	0
c038	60	female	64	155	26.64	seafood	No	No	No	No	No	8	4	8	8	0	-	0	-	-	-	-	-	-	-	-	-	-	-	-	-	-	-	-	-	-	-	-	-	-	-	-	-	-	-	-3.33	-3.33	-8.67	-10.67
c039	35	male	70	167	25.1	consumer goods	Yes	No	Yes	No	No	6	7	10	2	8	-	0	-	-	-	-	-	-	-	-	-	-	-	-	-	-	-	-	-	-	-	-	-	-	-	-	-	-	-	0	0	0	0
c040	62	female	75	168	26.57	fruit and vegetable	Yes	Yes	No	No	No	20	7	10	8	1	1	1	-	-	-	-	-	-	-	-	-	-	-	-	-	-	-	-	-	-	-	-	5	5	-	-	-	-	-	-13	-13.33	-21	-24
c041	50	female	52	155	21.64	dried food	Yes	Yes	No	No	No	24	7	8	8	0	-	0	-	-	-	-	-	-	-	-	-	-	-	-	-	-	-	-	-	-	-	-	-	-	-	-	-	-	-	-0.67	-1.33	-1.67	-1.33
c042	46	male	80	164	29.74	consumer goods	Yes	No	Yes	No	No	15	7	10	4	0	6	0	-	-	-	-	-	-	-	-	-	-	-	-	-	-	-	-	-	-	-	-	-	-	-	-	-	-	-	0	0	-4	-5
c043	52	male	90	160	35.16	cooked food	Yes	No	No	No	Yes	15	7	12	0	6	6	1	-	-	-	-	-	-	-	-	-	-	-	-	-	-	-	-	-	-	-	-	-	-	6	6	-	-	-	-4	-4	-9.33	-10
c044	44	female	85	158	34.05	cooked food	Yes	No	No	No	Yes	12	7	10	0	5	5	0	-	-	-	-	-	-	-	-	-	-	-	-	-	-	-	-	-	-	-	-	-	-	-	-	-	-	-	0	0	-4	-6
c045	20	female	64	156	26.3	fruit and vegetable	Yes	No	No	No	No	2	7	10	10	0	-	0	-	-	-	-	-	-	-	-	-	-	-	-	-	-	-	-	-	-	-	-	-	-	-	-	-	-	-	-1.67	-5	-9.33	-11
c046	30	male	102	175	33.31	fruit and vegetable	Yes	Yes	Yes	No	No	6	5	8	4	2	2	1	-	-	-	-	-	-	-	-	-	-	-	-	-	-	-	-	-	-	-	-	-	-	-	-	6	-	-	-5	-6.33	-15.67	-14
c047	64	male	80	164	29.74	fruit and vegetable	No	Yes	Yes	No	No	25	7	10	7	0	3	0	-	-	-	-	-	-	-	-	-	-	-	-	-	-	-	-	-	-	-	-	-	-	-	-	-	-	-	-11.67	-8.67	-12.67	-15.67
c048	30	female	48	159	18.99	fruit and vegetable	Yes	No	No	No	No	3	7	10	10	0	-	0	-	-	-	-	-	-	-	-	-	-	-	-	-	-	-	-	-	-	-	-	-	-	-	-	-	-	-	0	0	-1.67	-2
c049	68	female	67	160	26.17	consumer goods	Yes	Yes	No	No	No	20	7	9	7	1	1	1	-	-	-	-	-	-	-	-	-	-	-	-	-	-	-	-	-	-	-	-	6	6	-	-	-	-	-	0	0	0	0
c050	40	male	80	170	27.68	fruit and vegetable	Yes	No	Yes	No	No	0.5	7	10	1	0	3	0	-	-	-	-	-	-	-	-	-	-	-	-	-	-	-	-	-	-	-	-	-	-	-	-	-	-	-	0	0	-2	-3
c051	26	female	95	159	37.58	fruit and vegetable	Yes	No	No	No	No	10	7	12	10	1	1	0	-	-	-	-	-	-	-	-	-	-	-	-	-	-	-	-	-	-	-	-	-	-	-	-	-	-	-	-6	-7.67	-11.67	-13.67
c052	43	male	70	165	25.71	dried food	Yes	Yes	No	No	No	2	7	13	7	3	3	1	-	-	-	-	-	-	-	-	-	-	-	-	-	-	-	-	-	-	7	7	-	-	6	6	-	-	-	0	0	0	0
c053	57	female	68	150	30.22	fruit and vegetable	Yes	Yes	No	No	No	30	7	10	8	1	1	1	-	-	4	4	-	-	-	-	-	-	-	-	-	-	-	-	-	-	-	-	-	-	-	-	-	-	-	0	-1.33	0	0
c054	39	male	65	168	23.03	fruit and vegetable	Yes	Yes	Yes	No	No	2	7	9	7	1	1	0	-	-	-	-	-	-	-	-	-	-	-	-	-	-	-	-	-	-	-	-	-	-	-	-	-	-	-	-2.67	0	0	0
c055	57	female	45	165	16.53	fruit and vegetable	Yes	Yes	No	No	No	40	7	10	8	1	1	1	-	-	4	4	-	-	-	-	-	5	-	-	-	-	-	-	-	-	-	-	-	-	-	-	-	-	-	0	0	0	0
c056	39	female	55	150	24.44	fruit and vegetable	Yes	Yes	Yes	No	No	10	7	11	9	1	1	1	-	-	6	6	-	-	-	-	-	-	-	-	-	-	-	-	-	-	-	-	-	-	-	-	-	-	-	0	0	0	0
c057	58	male	72	171	24.62	fruit and vegetable	Yes	Yes	Yes	No	No	20	7	10	8	1	1	0	-	-	-	-	-	-	-	-	-	-	-	-	-	-	-	-	-	-	-	-	-	-	-	-	-	-	-	0	-9.33	0	0
c058	24	male	58	168	20.55	cooked food	Yes	Yes	Yes	No	No	3	7	12	6	3	3	0	-	-	-	-	-	-	-	-	-	-	-	-	-	-	-	-	-	-	-	-	-	-	-	-	-	-	-	0	0	0	0
c059	30	male	80	165	29.38	dried food	Yes	Yes	Yes	No	No	12	7	11	7	2	2	0	-	-	-	-	-	-	-	-	-	-	-	-	-	-	-	-	-	-	-	-	-	-	-	-	-	-	-	-4.33	-6.33	0	0
c060	22	male	53	168	18.78	dried food	Yes	Yes	No	No	No	1	7	10	7	1	2	0	-	-	-	-	-	-	-	-	-	-	-	-	-	-	-	-	-	-	-	-	-	-	-	-	-	-	-	0	0	0	0
c061	40	female	65	165	23.88	dried food	Yes	Yes	No	No	No	13	7	11	7	2	2	1	-	-	-	-	-	-	-	-	5	6	-	-	-	-	-	-	-	-	-	-	-	-	-	-	-	-	-	0	0	0	0
c062	32	female	50	155	20.81	dried food	Yes	Yes	No	No	No	10	7	11	7	2	2	1	-	-	-	-	-	-	-	-	5	5	-	-	-	-	-	-	-	-	-	-	-	-	-	-	-	-	-	0	0	0	0
c063	31	female	55	154	23.19	dried food	Yes	Yes	Yes	No	No	10	7	12	10	1	1	0	-	-	-	-	-	-	-	-	-	-	-	-	-	-	-	-	-	-	-	-	-	-	-	-	-	-	-	-4.33	0	0	0
c064	38	male	61	151	26.75	dried food	Yes	Yes	Yes	No	No	5	7	11	5	3	3	1	-	-	5	5	-	-	-	-	-	-	-	-	-	-	-	-	-	-	-	-	-	-	-	-	-	-	-	0	-4.33	0	0
c065	24	female	80	163	30.11	dried food	Yes	Yes	Yes	No	No	1	7	13	9	2	2	1	-	-	-	-	-	-	-	-	5	-	-	-	-	-	-	-	-	-	-	-	6	6	-	-	-	-	-	0	0	0	0
c066	34	female	69	170	23.88	fruit and vegetable	Yes	Yes	No	No	No	10	7	11	9	1	1	1	-	-	5	5	-	-	-	-	5	-	-	-	-	-	-	-	-	-	-	-	-	-	6	6	-	-	-	0	0	0	0
c067	41	female	76	160	29.69	fruit and vegetable	Yes	Yes	Yes	No	No	1	7	10	8	1	1	1	-	-	-	-	4	-	4	-	-	-	-	-	-	-	-	-	-	-	-	-	-	-	-	-	-	-	-	-9.33	-10.33	0	0
c068	65	female	70	155	29.14	dried food	Yes	Yes	Yes	No	No	40	7	9	5	2	2	1	-	-	-	-	6	-	-	-	-	-	6	-	6	-	-	-	-	-	-	-	-	-	-	-	-	-	-	-14.33	-19.33	-9.33	-9.33
c069	42	female	50	160	19.53	fruit and vegetable	Yes	No	No	No	No	3	7	13	11	1	1	0	-	-	-	-	-	-	-	-	-	-	-	-	-	-	-	-	-	-	-	-	-	-	-	-	-	-	-	-5	-7	0	0
c070	26	male	65	175	21.22	cooked food	No	Yes	No	No	Yes	5	7	12	10	1	1	1	-	-	-	-	-	-	-	-	6	-	-	-	-	-	-	-	-	-	-	-	-	-	-	-	-	-	-	0	0	0	0
c071	61	female	53	157	21.5	cooked food	Yes	Yes	No	Yes	No	1	7	9	5	2	2	1	-	-	-	-	-	-	-	-	5	5	-	-	-	-	-	-	-	-	-	-	-	-	-	-	-	-	-	-4.33	-7.33	0	0
c072	34	female	56	155	23.31	cooked food	Yes	Yes	Yes	No	No	10	7	12	5	5	2	1	-	6	-	-	-	-	-	-	-	-	-	-	-	-	-	-	-	-	-	-	-	-	-	-	-	-	-	0	-4.33	0	0
c073	45	female	75	155	31.22	cooked food	Yes	Yes	No	No	Yes	30	7	12	7	3	2	1	6	6	-	-	-	-	-	-	-	-	-	-	-	-	-	-	-	-	-	-	-	-	-	-	-	-	-	-4.33	-4.33	0	0
c074	23	female	50	160	19.53	cooked food	Yes	Yes	No	Yes	No	5	7	12	2	7	3	1	-	-	-	-	-	-	-	-	5	-	-	-	-	-	-	-	-	-	-	-	-	-	-	-	-	-	-	-4.67	-9.33	0	0
c075	44	female	71	167	25.46	cooked food	Yes	Yes	No	Yes	Yes	29	7	9.5	2	5.5	2	1	-	7	-	-	-	-	-	-	-	-	-	-	-	-	-	-	-	-	-	-	-	-	-	-	-	-	-	0	0	0	0
c076	68	female	49	150	21.78	cooked food	Yes	Yes	No	No	No	1	7	12	10	1	1	1	-	-	-	-	-	-	-	-	-	5	-	-	-	-	-	-	-	-	-	-	-	-	-	-	-	-	-	0	-4.33	0	0
c077	21	female	95	160	37.11	dried food	Yes	Yes	Yes	No	No	5	7	11	6	3	2	1	-	-	-	-	-	5	-	-	-	-	-	-	-	-	-	-	-	-	5	5	-	-	-	-	-	-	-	0	0	0	0
c078	36	female	62	161	23.92	consumer goods	Yes	Yes	No	No	No	17	7	13	7	4	2	1	-	-	-	-	-	-	-	-	-	5	-	-	-	-	-	-	-	-	-	-	-	-	-	-	-	-	-	0	0	-1.67	-1.67
c079	41	female	53	150	23.56	cooked food	Yes	Yes	No	Yes	No	13	7	11	1	5	5	1	-	-	-	-	-	-	-	-	5	-	-	-	-	-	-	-	-	-	-	-	-	-	5	5	-	-	-	-4.33	-9.33	0	0
c080	43	female	70	155	29.14	cooked food	Yes	Yes	No	Yes	No	2	7	12	1	6	5	1	-	-	6	6	-	-	-	-	-	-	-	-	-	-	-	-	-	-	-	-	-	-	-	-	-	-	-	0	0	0	0
c081	42	female	50	150	22.22	dried food	Yes	Yes	Yes	No	No	3	7	11	3	5	3	1	-	7	6	6	-	-	-	-	-	7	-	-	-	-	-	-	-	-	-	-	-	-	-	-	-	-	-	0	0	0	0
c082	33	female	48	150	21.33	consumer goods	Yes	Yes	No	Yes	No	3	7	12	2	5	5	1	-	7	7	-	-	-	-	-	-	-	-	-	-	-	-	-	-	-	-	-	-	-	-	-	-	-	-	0	0	0	0
c083	30	female	44	150	19.56	consumer goods	Yes	Yes	No	Yes	No	7	7	11	1	5	5	1	-	7	7	-	-	-	-	-	-	6	-	-	-	-	-	-	-	-	-	-	6	6	-	-	-	-	-	0	0	0	0
c084	50	female	55	155	22.89	dried food	Yes	Yes	Yes	No	No	3	7	16	10	3	3	1	-	-	-	-	-	-	-	-	-	-	-	-	-	-	-	-	-	-	-	-	-	-	5	5	-	-	-	0	0	0	0
c085	21	female	51	156	20.96	fruit and vegetable	Yes	Yes	Yes	No	No	0.25	7	8	4	2	2	1	-	-	-	-	-	-	-	-	-	-	-	-	-	-	-	-	-	-	5	5	-	-	-	-	-	-	-	0	0	0	0
c086	60	female	70	150	31.11	consumer goods	Yes	Yes	No	No	No	30	7	8	6	1	1	1	-	-	-	-	-	-	-	5	5	-	-	-	-	-	-	-	-	-	-	-	-	-	-	-	-	-	-	-4.33	-7.33	0	0
c087	61	female	62	152	26.84	cooked food	Yes	Yes	Yes	No	No	20	7	12	6	3	3	0	-	-	-	-	-	-	-	-	-	-	-	-	-	-	-	-	-	-	-	-	-	-	-	-	-	-	-	0	0	0	0
c088	60	male	68	170	23.53	dried food	Yes	Yes	Yes	No	No	40	7	12	10	1	1	1	-	-	-	-	-	-	-	-	-	6	-	-	-	-	-	-	-	-	-	-	-	-	-	-	-	-	-	-4.33	-4.67	0	0
c089	54	female	60	160	23.44	fruit and vegetable	Yes	Yes	Yes	No	No	0.33	7	12	5	5	2	1	-	-	5	-	-	-	-	-	-	-	-	5	-	5	-	-	-	-	-	-	-	-	-	-	-	-	-	0	0	0	0
c090	71	female	58	155	24.14	consumer goods	Yes	Yes	No	No	No	10	7	6	4	1	1	1	-	-	-	-	-	-	-	-	-	-	-	-	-	-	-	-	-	-	-	-	6	6	-	-	-	-	-	-24.33	-29.33	0	0
c091	27	female	50	160	19.53	cooked food	Yes	Yes	No	Yes	No	2	7	11	1	5	5	0	-	-	-	-	-	-	-	-	-	-	-	-	-	-	-	-	-	-	-	-	-	-	-	-	-	-	-	0	0	0	0
c092	39	female	49	150	21.78	cooked food	Yes	Yes	Yes	No	Yes	6	7	12	6	4	2	1	-	-	-	-	-	-	-	-	-	-	-	-	-	-	5	5	-	-	-	-	-	-	-	-	-	-	-	-3	-4	0	0
c093	52	male	60	160	23.44	consumer goods	Yes	Yes	No	Yes	No	4	7	12	2	5	5	1	-	-	7	7	-	-	-	-	-	-	-	-	-	-	-	-	-	-	-	-	7	7	-	-	-	-	-	0	-4.33	0	0
c094	32	female	72	155	29.97	cooked food	Yes	Yes	No	Yes	Yes	7	7	9	1	5	3	1	-	-	-	-	-	-	-	-	6	-	-	-	-	-	-	-	-	-	-	-	-	-	-	-	-	-	-	0	0	0	0
c095	25	female	47	150	20.89	consumer goods	Yes	Yes	No	Yes	No	3	7	12	2	5	5	1	5	5	-	-	-	-	-	-	-	-	-	-	-	-	-	-	-	-	-	-	-	-	-	-	-	-	-	0	0	0	0
c096	20	female	50	148	22.83	consumer goods	Yes	Yes	No	Yes	No	1	7	12	2	5	5	0	-	-	-	-	-	-	-	-	-	-	-	-	-	-	-	-	-	-	-	-	-	-	-	-	-	-	-	-4.33	-5.33	-4.33	-4.33
c097	29	female	55	170	19.03	consumer goods	Yes	Yes	No	Yes	No	6	7	12	2	5	5	1	-	-	5	5	-	-	-	-	-	-	-	-	-	-	-	-	-	-	-	-	5	5	-	-	-	-	-	0	0	0	0
c098	55	female	55	155	22.89	dried food	No	Yes	Yes	No	No	10	7	12	3	6	3	1	-	-	6	6	-	-	-	-	-	-	-	-	-	-	-	-	-	-	-	-	-	-	-	-	-	-	-	0	0	0	0
c099	34	female	79	167	28.33	dried food	No	Yes	Yes	No	No	3	7	12	3	6	3	0	-	-	-	-	-	-	-	-	-	-	-	-	-	-	-	-	-	-	-	-	-	-	-	-	-	-	-	0	0	0	0
c100	26	male	55	170	19.03	dried food	No	Yes	Yes	No	No	1	7	12	3	6	3	1	-	-	7	7	-	-	-	-	7	-	-	-	-	-	-	-	-	-	-	-	7	7	-	-	-	-	-	0	0	0	0
c101	64	female	55	150	24.44	dried food	No	Yes	Yes	No	No	8	7	11	2	4	5	0	-	-	-	-	-	-	-	-	-	-	-	-	-	-	-	-	-	-	-	-	-	-	-	-	-	-	-	0	-4.33	0	0
c102	36	female	84	150	37.33	fruit and vegetable	Yes	Yes	Yes	No	No	0.083	7	12	2	5	5	0	-	-	-	-	-	-	-	-	-	-	-	-	-	-	-	-	-	-	-	-	-	-	-	-	-	-	-	-4	-6	0	0
c103	40	female	51	150	22.67	fruit and vegetable	Yes	Yes	Yes	No	No	0.25	7	13	5	5	3	1	5	5	-	-	-	5	-	-	-	6	-	-	-	-	-	-	-	-	5	5	-	-	-	-	-	-	-	0	0	0	0
c104	55	female	57	150	25.33	fruit and vegetable	Yes	Yes	Yes	No	No	1	7	12	5	5	2	1	-	-	-	-	-	-	-	-	6	-	-	-	-	-	-	-	-	-	-	-	-	-	-	-	-	-	-	-4	-6	0	0
c105	58	female	75	155	31.22	fruit and vegetable	Yes	No	No	No	No	10	7	12	5	5	1	1	-	-	-	-	5	5	-	-	-	-	5	5	6	6	-	-	-	-	-	-	-	-	-	-	-	-	-	-5	-7	0	0
c106	24	female	60	159	23.73	dried food	Yes	No	No	No	No	3	7	12	10	1	1	0	-	-	-	-	-	-	-	-	-	-	-	-	-	-	-	-	-	-	-	-	-	-	-	-	-	-	-	0	0	0	0
c107	48	female	65	155	27.06	dried food	Yes	Yes	Yes	No	No	3	7	11	8	2	1	1	-	-	-	-	-	-	-	-	-	-	-	-	-	-	-	-	-	-	-	-	6	6	-	-	-	-	-	0	0	0	0
c108	60	female	60	155	24.97	consumer goods	Yes	Yes	Yes	No	No	20	7	12	8	2	2	1	-	-	6	6	-	-	-	-	-	-	-	-	-	-	-	-	-	-	-	-	-	-	-	-	-	-	-	-4.33	-9	0	0
c109	27	male	62	177	19.79	fruit and vegetable	Yes	Yes	No	No	No	20	7	11	9	0	2	1	-	-	-	-	-	-	-	-	-	-	-	-	5	5	5	5	-	-	-	-	-	-	-	-	-	-	-	0	-4.67	0	0
c110	60	female	85	164	31.6	consumer goods	Yes	Yes	No	No	No	16	7	7	3	1	1	1	-	-	-	-	-	-	-	-	-	-	-	-	-	-	-	-	-	-	-	-	-	-	-	-	-	-	6	-24.67	-14.67	-14.33	-15
c111	64	female	56	153	23.92	consumer goods	Yes	Yes	Yes	Yes	No	20	7	10	5	3	2	1	-	-	-	-	-	-	-	-	-	-	-	-	-	-	-	-	-	-	-	-	-	-	-	-	-	-	8	0	0	0	0
c112	64	male	79	168	27.99	consumer goods	Yes	Yes	No	No	No	8	5	8	5	1	2	1	-	-	-	-	-	-	-	-	5	-	-	-	-	-	-	-	-	-	-	-	-	-	7	5	-	-	-	-10	-10	0	0
c113	40	female	60	153	25.63	cooked food	Yes	Yes	Yes	Yes	Yes	8	6	10	2	4	4	1	-	5	3	3	-	-	-	-	-	-	-	-	-	-	-	-	-	-	-	-	-	-	3	3	-	-	-	-5	-5	0	0
c114	24	female	56	165	20.57	cooked food	Yes	Yes	Yes	Yes	No	6	7	12	3	3	6	0	-	-	-	-	-	-	-	-	-	-	-	-	-	-	-	-	-	-	-	-	-	-	-	-	-	-	-	0	0	0	0
c115	63	female	68	160	26.56	consumer goods	Yes	Yes	Yes	No	No	2	7	12	4	4	4	1	-	6	6	-	-	-	8	-	-	-	-	8	-	8	-	8	-	-	-	-	7	4	-	-	-	-	-	-5	-40	0	0
c116	60	female	47	154	19.82	fruit and vegetable	Yes	Yes	Yes	No	No	15	7	14	10	2	2	1	7	-	8	8	-	-	-	-	5	-	-	-	-	-	-	-	-	-	-	-	-	-	-	-	-	-	-	-20	0	0	0
c117	45	female	49	156	20.13	fruit and vegetable	Yes	Yes	Yes	No	No	2	7	11	9	1	1	1	4	8	-	-	-	-	-	-	-	-	-	-	-	-	-	-	-	-	-	-	-	-	-	-	-	-	-	-10	0	0	0
c118	49	male	70	163	26.35	consumer goods	Yes	Yes	Yes	No	No	7	5	14	6	3	5	1	-	8	8	-	-	-	-	-	-	-	-	-	-	-	-	-	-	-	-	-	-	-	-	-	-	-	-	0	0	0	0
c119	50	female	60	158	24.03	consumer goods	Yes	Yes	Yes	No	No	7	5	14	7	3	4	0	-	-	-	-	-	-	-	-	-	-	-	-	-	-	-	-	-	-	-	-	-	-	-	-	-	-	-	0	0	0	0
c120	66	female	65	154	27.41	fruit and vegetable	Yes	Yes	Yes	No	No	3	6	12	8	2	2	1	-	-	-	-	-	-	-	-	-	-	-	-	-	-	-	-	-	-	-	-	7	7	-	-	-	-	-	-50	-50	0	0
c121	24	female	42	150	18.67	cooked food	Yes	Yes	Yes	Yes	Yes	0.5	7	12	2	5	5	0	-	-	-	-	-	-	-	-	-	-	-	-	-	-	-	-	-	-	-	-	-	-	-	-	-	-	-	0	-5	0	0
c122	24	female	43	154	18.13	cooked food	Yes	Yes	Yes	Yes	Yes	1	7	10	4	4	2	0	-	-	-	-	-	-	-	-	-	-	-	-	-	-	-	-	-	-	-	-	-	-	-	-	-	-	-	0	0	0	0
c123	24	female	45	153	19.22	fruit and vegetable	Yes	Yes	Yes	No	No	5	7	9	3	3	3	0	-	-	-	-	-	-	-	-	-	-	-	-	-	-	-	-	-	-	-	-	-	-	-	-	-	-	-	0	0	0	0
c124	25	male	65	170	22.49	cooked food	Yes	Yes	Yes	Yes	Yes	1	7	10	3	4	3	0	-	-	-	-	-	-	-	-	-	-	-	-	-	-	-	-	-	-	-	-	-	-	-	-	-	-	-	0	0	0	0
c125	60	female	60	155	24.97	fruit and vegetable	Yes	Yes	Yes	No	No	10	7	8	4	3	1	0	-	-	-	-	-	-	-	-	-	-	-	-	-	-	-	-	-	-	-	-	-	-	-	-	-	-	-	-5	-5	0	0
c126	67	male	64	170	22.15	cooked food	Yes	Yes	Yes	Yes	Yes	15	7	11	6	3	2	1	-	-	-	-	-	-	-	-	3	-	-	-	-	-	-	-	-	-	-	-	-	-	6	6	-	-	6	-20	-25	0	0
c127	35	female	64	165	23.51	cooked food	Yes	Yes	Yes	Yes	Yes	5	6	12	2	5	5	1	-	2	6	-	-	-	-	5	6	-	-	-	-	-	-	-	10	10	-	-	-	-	-	-	-	-	10	-15	0	0	0
c128	26	female	45	155	18.73	cooked food	Yes	Yes	Yes	Yes	Yes	1	6	10	2	4	4	0	-	-	-	-	-	-	-	-	-	-	-	-	-	-	-	-	-	-	-	-	-	-	-	-	-	-	-	0	0	0	0
c129	56	female	66	156	27.12	cooked food	Yes	Yes	Yes	No	Yes	36	6	10	4	3	3	0	-	-	-	-	-	-	-	-	-	-	-	-	-	-	-	-	-	-	-	-	7	5	-	-	-	-	-	0	0	0	0
c130	48	male	105	176	33.9	consumer goods	Yes	Yes	Yes	No	No	3	7	11	4	2	5	1	7	-	-	-	-	-	6	-	-	-	-	-	-	-	-	-	-	-	-	-	-	-	7	7	-	-	-	-12	-12	0	0
c131	41	female	66	165	24.24	cooked food	Yes	Yes	Yes	Yes	No	6	6	12	2	5	5	1	-	-	2	2	-	-	-	-	-	-	-	-	-	-	-	-	-	-	-	-	-	-	-	-	-	-	10	0	0	0	0
c132	60	female	65	150	28.89	consumer goods	Yes	Yes	No	No	No	39	7	5	3	1	1	0	-	-	-	-	-	-	-	-	-	-	-	-	-	-	-	-	-	-	-	-	-	-	-	-	-	-	-	0	0	0	0
c133	38	female	63	152	27.27	fruit and vegetable	Yes	Yes	Yes	No	No	3	7	12	3	2	7	0	-	-	-	-	-	-	-	-	-	-	-	-	-	-	-	-	-	-	-	-	-	-	-	-	-	-	-	0	0	0	0
c134	48	female	62	155	25.81	consumer goods	Yes	Yes	No	No	No	24	7	10	5	3	2	1	-	5	5	-	-	-	-	-	-	-	5	5	-	-	5	5	-	-	-	-	5	5	-	-	5	5	-	-40	-50	0	0
c135	33	female	63	160	24.61	cooked food	Yes	Yes	Yes	Yes	Yes	14	1	12	2	5	5	0	-	-	-	-	-	-	-	-	-	-	-	-	-	-	-	-	-	-	-	-	-	-	-	-	-	-	-	0	0	0	0
c136	32	male	64	167	22.95	consumer goods	Yes	Yes	Yes	Yes	No	6.5	1	11	1	8	2	1	10	-	-	-	-	5	-	-	4	-	-	-	-	-	-	-	-	-	-	-	9	9	-	-	-	-	-	0	0	0	0
c137	39	female	62	152	26.84	consumer goods	Yes	Yes	Yes	Yes	No	3	7	12.5	2.5	6	4	1	-	-	-	-	-	-	-	-	-	-	-	-	-	-	-	-	-	-	-	-	-	-	5	5	-	-	-	0	-10	0	0
c138	49	female	70	165	25.71	consumer goods	Yes	Yes	Yes	No	No	5	6	12	4	4	4	1	-	-	-	-	-	-	-	-	-	-	-	-	-	-	-	-	-	-	8	8	-	-	-	-	-	-	-	-5	-5	0	0
c139	36	female	48	150	21.33	consumer goods	Yes	Yes	Yes	No	No	15	7	8	3	2	3	0	-	-	-	-	-	-	-	-	-	-	-	-	-	-	-	-	-	-	-	-	-	-	-	-	-	-	-	0	0	0	0
c140	33	female	58	150	25.78	cooked food	Yes	Yes	Yes	No	No	11	6	12	5	3	4	0	-	-	-	-	-	-	-	-	-	-	-	-	-	-	-	-	-	-	-	-	-	-	-	-	-	-	-	0	0	0	0
c141	31	female	65	159	25.71	cooked food	Yes	Yes	Yes	Yes	No	2	6	11	6	1	4	0	-	-	-	-	-	-	-	-	-	-	-	-	-	-	-	-	-	-	-	-	-	-	-	-	-	-	-	0	0	0	0
c142	35	male	65	170	22.49	consumer goods	Yes	Yes	Yes	Yes	No	18	6	12	3	5	4	1	-	-	-	-	-	-	-	-	5	-	-	-	-	-	-	-	-	-	-	-	-	-	-	-	-	-	-	0	0	0	0
c143	63	female	71	155	29.55	consumer goods	Yes	Yes	Yes	No	No	20	3	9	5	2	2	1	-	-	5	5	-	-	-	-	-	-	5	5	-	-	-	-	-	-	-	-	5	5	-	-	-	-	-	-1.67	-4.33	0	0
c144	63	female	55	159	21.76	consumer goods	Yes	Yes	No	No	No	5	5	12	8	2	2	1	-	-	-	-	-	-	-	-	-	-	-	-	-	-	-	-	-	-	-	-	-	-	-	-	8	8	8	-4.33	-6.33	0	0
c145	61	female	53	156	21.78	consumer goods	Yes	Yes	Yes	No	No	5	5	12	7	3	2	1	-	-	-	-	-	-	-	-	-	-	-	-	-	-	-	-	-	-	-	-	5	5	-	-	5	5	5	0	-4.33	0	0
c146	67	female	67	155	27.89	dried food	No	Yes	Yes	No	No	8	5	11	2	3	6	0	-	-	-	-	-	-	-	-	-	-	-	-	-	-	-	-	-	-	-	-	-	-	-	-	-	-	-	-18.67	-19.33	0	0
c147	34	female	54	160	21.09	cooked food	Yes	Yes	No	Yes	No	3	7	11	1	5	5	0	-	-	-	-	-	-	-	-	-	-	-	-	-	-	-	-	-	-	-	-	-	-	-	-	-	-	-	0	0	0	0
c148	37	female	50	160	19.53	consumer goods	Yes	Yes	No	No	No	5	7	12	1	8	3	0	-	-	-	-	-	-	-	-	-	-	-	-	-	-	-	-	-	-	-	-	-	-	-	-	-	-	-	-3.67	-4.67	0	0
c149	40	female	60	150	26.67	consumer goods	Yes	Yes	No	No	No	7	7	12	2	8	2	0	-	-	-	-	-	-	-	-	-	-	-	-	-	-	-	-	-	-	-	-	-	-	-	-	-	-	-	-4.33	-9.33	0	0
c150	30	female	50	150	22.22	cooked food	Yes	Yes	No	Yes	No	1	7	11	1	7	3	1	-	-	5	5	-	-	-	-	-	-	-	-	-	-	-	-	-	-	-	-	-	-	-	-	-	-	-	0	0	0	0
c151	41	male	92	169	32.21	cooked food	Yes	Yes	No	No	Yes	10	7	11	2	8	1	1	-	-	-	-	-	-	-	-	-	-	-	-	-	-	-	-	-	-	-	-	-	-	5	5	-	-	-	-4.33	-5	0	0
c152	66	female	75	168	26.57	cooked food	Yes	Yes	No	Yes	Yes	12	7	11	1	8	2	1	-	-	5	5	-	-	-	-	-	-	-	-	-	-	-	-	-	-	-	-	5	5	-	-	-	-	-	-14.33	-19	0	0
c153	18	female	54	164	20.08	cooked food	Yes	Yes	No	Yes	No	3	5	9.5	2	3.5	4	0	-	-	-	-	-	-	-	-	-	-	-	-	-	-	-	-	-	-	-	-	-	-	-	-	-	-	-	0	0	0	0
e001	53	female	78.5	152	33.98	cooked food	Yes	Yes	No	No	Yes	20	7	10.5	2.5	8	-	1	-	-	-	-	-	-	-	-	-	-	-	-	-	-	-	-	-	-	-	-	2	-	-	-	-	-	-	-11.67	-2.83	1	3
e002	56	female	63	160	24.61	cooked food	Yes	Yes	Yes	No	No	35	7	8	2	6	-	1	5	5	5	-	-	-	-	-	-	-	-	-	-	-	-	-	-	-	-	-	-	-	-	-	-	-	-	0	-10.33	21.33	14
e003	42	male	65	175	21.22	seafood	Yes	No	No	No	No	12	7	7	5	2	-	0	-	-	-	-	-	-	-	-	-	-	-	-	-	-	-	-	-	-	-	-	-	-	-	-	-	-	-	-3.33	-10.67	14.33	14.67
e004	29	male	68	165	24.98	consumer goods	Yes	Yes	No	No	Yes	4	7	8	2	4	4	1	-	-	4	4	-	-	-	4	-	-	-	-	-	-	-	-	-	-	-	-	-	-	-	-	-	-	-	6.67	3.33	18	18
e005	28	female	58	164	21.56	cooked food	Yes	Yes	Yes	No	No	5.33	7	10	4	6	-	1	-	-	6	6	-	-	-	-	-	-	-	-	4	4	-	-	7	7	-	-	-	-	-	-	-	-	-	12.33	7.33	18	18.67
e006	56	female	52	153	22.21	cooked food	Yes	No	No	No	No	30	7	7	2	4.5	0.5	1	-	8	8	8	-	-	-	-	-	-	-	-	-	-	-	-	-	-	-	-	-	-	-	-	-	-	-	-26.33	-21.67	2.33	1.17
e007	49	female	55	153	23.5	seafood	Yes	Yes	No	No	No	10	7	9	4	5	-	1	-	-	-	-	-	-	-	-	-	-	-	-	-	-	-	-	-	5	-	-	-	-	-	-	-	-	-	8.33	-3.17	3.83	5
e008	38	female	51.5	165	18.92	consumer goods	Yes	Yes	No	No	No	10	7	10	3	7	-	1	8	8	8	8	-	-	-	-	-	-	-	-	-	-	-	-	-	-	-	-	-	-	-	-	-	-	-	13.5	5.5	15	16.5
e009	51	female	59	155	24.56	meat	Yes	Yes	No	No	No	10	7	9	5	4	-	1	-	3	-	-	-	-	-	-	-	-	-	-	-	-	-	-	-	-	-	-	-	-	-	-	-	-	-	-2.67	-21.33	-2.67	-4.5
e010	64	female	68	160	26.56	seafood	No	Yes	No	No	No	30	7	11	4	7	-	1	-	-	-	-	-	-	-	-	3	-	-	-	-	-	-	-	-	-	-	-	-	-	-	-	-	-	-	-4.83	-18.67	0.83	0.67
e011	43	female	62	165	22.77	cooked food	Yes	Yes	No	No	Yes	9	7	9	1	8	-	1	-	-	-	-	-	-	-	-	-	-	-	7	-	-	-	-	-	-	-	-	-	-	-	-	-	-	5	2.67	3.67	25.67	23.67
e012	53	female	86	170	29.76	consumer goods	Yes	Yes	No	No	Yes	20	7	7	3	4	-	1	-	-	-	-	8	-	8	-	-	8	-	8	-	8	-	-	-	-	-	-	-	-	-	-	-	-	-	0	-22.33	19.33	20.33
e013	45	female	49	157	19.88	cooked food	No	Yes	No	No	No	10	7	7	5	2	-	1	-	-	-	-	-	-	6	-	-	-	-	6	-	6	-	6	-	6	-	-	-	-	-	-	-	-	-	2	-6	1.33	1.67
e014	37	female	98	160	38.28	cooked food	No	Yes	No	Yes	No	10	7	12	4	8	-	1	-	-	-	-	-	-	-	-	3	-	-	-	-	-	-	-	-	-	-	-	-	-	6	4	-	-	-	-9.33	-3.33	-7	-8.33
e015	62	female	63	157	25.56	cooked food	Yes	Yes	No	No	No	10	7	8	5	2	1	1	-	-	6	6	-	-	-	-	-	-	-	-	-	-	-	-	-	-	-	-	-	-	-	-	-	-	-	-10	-29.67	18.67	20
e016	64	male	74	158	29.64	meat	No	Yes	No	No	No	8	7	5	5	0	-	1	-	-	-	-	-	-	-	-	8	-	-	-	-	-	-	-	-	-	-	-	-	-	-	-	-	-	-	-11	-22.33	-15	-17.67
e017	50	female	55	150	24.44	cooked food	No	Yes	No	No	No	20	7	11	2	9	-	1	5	-	5	5	-	-	-	-	5	5	-	-	-	-	5	-	-	-	-	-	-	-	-	-	-	-	-	-0.67	-6.17	14.83	15.33
e018	62	female	86	160	33.59	consumer goods	No	Yes	No	No	No	40	7	12	6	6	-	1	-	-	-	-	-	-	-	-	-	-	-	-	-	-	-	-	-	-	-	-	-	-	6	6	-	-	-	-25	-28.33	0	0
e019	60	female	60	155	24.97	dried food	Yes	Yes	Yes	No	No	15	7	10	4	3	3	1	-	-	-	2	-	-	-	-	-	-	-	-	-	-	-	-	-	-	-	-	-	-	-	-	-	-	-	-7	-21.67	24	28.33
e020	50	female	61	160	23.83	consumer goods	Yes	Yes	No	No	No	22	7	8	0	8	-	1	3	-	-	-	-	-	2	-	-	-	-	-	-	-	-	-	-	-	-	-	-	-	-	2	-	-	-	-8.33	-12	-3.33	-6.67
e021	80	female	49	160	19.14	cooked food	Yes	Yes	No	No	Yes	62	7	8	3	3	2	1	-	-	-	-	4	-	4	-	-	-	4	4	4	4	4	-	-	-	-	-	-	-	-	-	-	-	-	-15.67	-28	0	0
e022	21	male	105	173	35.08	fruit and vegetable	Yes	No	No	No	No	0	7	4	3	1	-	0	-	-	-	-	-	-	-	-	-	-	-	-	-	-	-	-	-	-	-	-	-	-	-	-	-	-	-	6	5.67	7.17	7.67
e023	67	female	46	150	20.44	fruit and vegetable	Yes	No	Yes	No	No	38	7	12	4	8	-	1	6	6	6	6	-	-	-	-	-	-	-	-	-	-	-	-	-	-	-	-	-	-	-	-	-	-	-	-6.07	-5.17	2.33	2.67
e024	53	female	63	149	28.38	consumer goods	No	Yes	No	Yes	No	20	7	7	3	4	-	1	-	-	-	-	-	-	-	-	-	-	-	-	-	-	-	-	-	-	-	-	-	-	-	-	-	-	8	-10.17	-19.33	0	0
e025	60	female	56	157	22.72	cooked food	No	Yes	No	No	Yes	2	6	10	4	6	-	1	-	-	-	-	-	-	-	-	-	-	-	-	-	-	-	-	-	-	-	-	6	-	6	-	-	-	-	3.33	-4.33	4.33	7.33
e026	48	female	76	166	27.58	fruit and vegetable	No	Yes	No	No	No	2	7	10	2	8	-	1	-	-	-	-	-	-	-	-	-	-	-	-	9	9	-	-	-	-	-	-	-	-	-	-	-	-	-	3.67	2.67	10	10.33
e027	55	female	70	165	25.71	dried food	No	Yes	No	No	No	20	7	12	6	6	-	1	-	3	3	3	-	-	-	-	-	-	-	-	-	-	-	-	-	-	-	-	-	-	3	3	-	-	-	8	7.33	16.67	18.17
e028	40	male	70.5	166	25.58	cooked food	Yes	Yes	No	No	No	10	6	8	5	3	-	1	-	4	4	4	-	4	-	4	-	-	-	-	-	-	-	-	-	-	-	-	-	-	4	4	4	4	4	2.33	0	1.5	2.17
e029	23	female	47	152	20.34	consumer goods	Yes	Yes	No	No	Yes	2	7	10	5	5	-	1	-	-	-	-	-	-	-	-	-	-	-	-	8	-	-	-	-	-	-	-	-	-	-	-	-	-	-	2.33	-2.67	7.67	6.33
e030	64	female	68	164	25.28	seafood	No	Yes	No	No	No	20	7	9	5	4	-	1	-	-	-	-	-	-	-	-	-	-	-	-	-	-	-	-	-	-	-	7	-	-	-	-	-	-	-	2.67	10.5	8.67	12.67
e031	60	female	58	153	24.78	seafood	Yes	Yes	No	No	No	40	7	11	3	8	-	1	-	-	7	-	-	-	-	-	-	-	-	-	-	-	-	-	-	-	-	-	-	-	-	-	-	-	-	1.5	-13.67	8.33	6.5
e032	57	male	57	165	20.94	seafood	No	Yes	No	No	No	20	7	6.5	0	6.5	-	1	-	-	-	-	-	-	-	-	-	-	-	-	-	-	-	-	-	-	-	-	10	-	-	-	-	-	-	-3.67	-25.33	13.33	16
e033	22	female	56	155	23.31	consumer goods	Yes	Yes	No	No	No	1	7	8	2	6	-	1	-	-	-	-	-	-	-	-	-	-	-	-	-	-	-	-	-	-	-	-	-	-	5	5	-	-	-	4.67	6	16.33	17.67
e034	20	female	41	160	16.02	consumer goods	Yes	Yes	Yes	No	No	1	7	9	4.5	4.5	-	1	-	-	5	-	-	-	-	-	-	-	-	-	-	-	-	-	-	-	-	-	-	-	-	-	-	-	-	10	-10	20	30.33
e035	47	male	75	175	24.49	meat	Yes	Yes	No	No	No	15	7	12	10	2	-	1	-	-	-	3	-	-	-	-	5	-	-	-	-	-	-	-	-	-	-	-	-	-	-	-	-	-	-	2.33	-11	5	1
e036	64	female	70	150	31.11	seafood	Yes	Yes	No	No	No	40	7	12	6	6	-	1	-	-	7	-	-	-	-	-	-	-	7	-	-	-	-	-	-	-	-	-	-	-	-	-	-	-	-	-11.33	-20.5	10	8
e037	44	female	59	156	24.24	dried food	Yes	Yes	No	No	No	1.5	7	8.5	4	4.5	-	1	3	3	-	-	-	-	-	-	-	-	-	-	-	-	-	-	-	-	-	-	-	-	-	-	-	-	-	4.83	-9.5	6.17	4.83
e038	58	female	63	162	24.01	meat	Yes	Yes	No	No	No	40	7	10	2	8	-	1	4	-	-	-	-	-	-	-	-	-	-	-	-	-	-	-	-	-	-	-	-	-	-	-	-	-	5	1	-14.67	19.67	24.33
e039	56	female	53	153	22.64	seafood	Yes	Yes	No	No	No	20	7	8	2	6	-	1	-	-	5	5	-	-	5	-	-	-	-	-	-	-	-	-	-	-	-	-	-	-	-	-	-	-	-	-25.33	-13.67	18	20.67
e040	54	male	83	170	28.72	fruit and vegetable	Yes	No	No	No	No	1	7	9	6	3	-	1	-	-	-	-	-	-	-	-	2	2	-	-	-	-	-	-	-	-	-	-	-	-	-	-	-	-	-	-1.83	1.17	8.27	6.17
e041	33	female	42	150	18.67	fruit and vegetable	Yes	Yes	No	No	No	5	7	10	3	7	-	1	-	-	-	-	-	-	-	-	-	-	-	-	-	-	-	-	-	-	2	2	-	-	-	-	-	-	-	-2.17	5	-8.67	-9.5
e042	58	female	65	156	26.71	fruit and vegetable	Yes	No	No	No	No	1	7	9	6	3	-	1	-	-	-	-	-	-	-	-	-	-	-	-	-	-	-	-	-	-	-	-	-	-	-	-	3	-	-	-3.83	-11.83	14.83	13.17
e043	49	female	52	150	23.11	fruit and vegetable	Yes	Yes	No	No	No	20	7	10	3	7	-	1	-	-	2	-	-	-	-	-	-	-	-	-	-	-	1	-	-	-	-	-	-	-	-	-	-	-	-	-1.5	-8.17	16.17	19.67
e044	73	female	52	150	23.11	fruit and vegetable	Yes	Yes	No	No	No	16	7	8	4	4	-	1	-	-	3	3	-	-	-	-	-	-	-	-	-	-	-	-	-	-	-	-	-	-	-	-	-	-	-	-3.17	-10.5	6.33	8.5
e045	57	male	71.5	165	26.26	fruit and vegetable	Yes	Yes	No	No	No	7	7	12	2	10	-	1	-	-	7	-	-	-	-	-	-	-	-	-	-	-	-	-	-	-	9	-	-	-	9	-	-	-	-	1.5	-29.67	4	-5.33
e046	38	female	60	160	23.44	fruit and vegetable	Yes	Yes	No	No	No	10	7	10	0	10	-	1	-	-	-	-	-	-	-	-	-	-	-	-	-	-	-	-	-	-	-	-	8	8	-	-	-	-	-	4.5	-1.83	14.5	12.83
e047	62	male	75.4	171	25.79	fruit and vegetable	Yes	No	No	No	No	50	7	14	7	7	-	1	-	-	-	-	-	-	-	-	-	-	-	-	-	-	-	-	-	-	-	-	-	-	1	1	-	-	-	-14.33	-11.83	9	11.17
e048	34	male	75.3	170	26.06	fruit and vegetable	No	Yes	No	No	No	5	7	8	4	4	-	1	-	-	-	-	-	3	-	-	-	-	-	-	-	-	-	-	-	-	-	-	-	-	-	-	-	-	-	2.5	3	22.5	21
e049	59	female	43	150	19.11	fruit and vegetable	Yes	Yes	No	No	No	20	7	13	1	12	-	1	-	-	-	-	-	-	-	-	-	-	-	-	-	-	-	-	-	5	-	-	-	-	-	-	-	-	-	0.5	-4.33	18.5	19.83
e050	34	female	60	155	24.97	cooked food	Yes	No	No	No	No	5	7	11	1	4	6	1	-	10	10	10	-	-	8	8	-	-	-	-	-	-	-	-	-	-	-	-	-	-	-	-	-	-	-	2.33	2	2	1.33
e051	48	female	50	155	20.81	dried food	Yes	Yes	No	No	No	20	7	8	2	6	-	1	-	-	-	-	-	2	-	-	-	-	-	-	-	-	-	-	-	-	-	-	-	-	-	-	-	-	2	4	-2.33	10.67	9.33
e052	65	female	52	150	23.11	cooked food	No	Yes	No	No	No	30	7	9	5	4	-	1	-	-	-	-	5	-	5	-	-	-	5	5	5	5	-	-	-	-	-	-	-	-	-	-	-	-	-	0.67	-9.67	1.33	-3.33
e053	69	female	45.5	155	18.94	consumer goods	Yes	No	No	No	No	15	7	5	3	0	2	0	-	-	-	-	-	-	-	-	-	-	-	-	-	-	-	-	-	-	-	-	-	-	-	-	-	-	-	-2	-22	-2	-0.67
e054	47	male	45	165	16.53	cooked food	No	No	No	Yes	Yes	30	7	11	2	7	2	1	-	-	2	-	4	-	-	-	-	-	-	-	-	-	6	-	-	-	-	-	-	-	-	-	-	-	-	-11.33	-15.33	4.33	3.67
e055	27	female	52	155	21.64	dried food	Yes	Yes	Yes	No	No	1	7	8	2	1	5	1	-	-	5	-	-	-	-	-	-	-	-	-	-	-	-	-	-	-	-	-	-	-	-	-	-	-	-	6.33	1.33	22.67	26
e056	50	female	57	155	23.73	fruit and vegetable	Yes	Yes	No	No	No	10	6	8	4	4	-	1	-	-	-	-	-	-	-	-	2	-	-	-	-	-	-	-	4	4	-	-	-	-	-	-	-	-	4	-3.67	-0.33	-5	-3.33
e057	58	female	92.5	160	36.13	cooked food	Yes	No	No	Yes	No	10	7	7	4	3	-	1	-	-	-	-	-	-	-	-	5	-	-	-	-	-	-	-	-	-	-	-	-	-	-	-	-	-	-	-29	-30	0	0
e058	61	female	78	160	30.47	consumer goods	No	Yes	No	No	No	40	7	11	3	8	-	1	-	5	-	5	-	-	-	-	-	-	-	-	-	-	-	-	-	-	-	-	-	-	-	-	-	-	-	-11	-28.67	2.33	1
e059	60	female	46	155	19.15	cooked food	Yes	No	No	No	No	12	7	8	5	3	-	1	-	-	-	-	-	-	-	-	-	-	-	-	-	-	-	-	-	-	-	-	5	5	5	5	5	5	-	8.67	-29.33	0	0
e060	43	female	80	167	28.69	cooked food	Yes	No	No	No	No	5	7	10	8	2	-	1	-	-	-	-	-	-	-	-	-	-	-	-	-	-	-	5	-	5	-	-	-	-	-	-	-	-	-	-19	-22.33	0	0
[truncated: 4 more columns]
